# Supplementary material
Source: PubMed Central journal article supplement (PMC6583055)
Supplement: jamacardiol-e183408-s001.pdf [file jamacardiol-e183408-s001.pdf]

## Supplementary Online Content

Lopes RD, de Barros e Silva PGM, de Andrade Jesuino I, et al. Timing of loading dose of atorvastatin in patients undergoing percutaneous coronary intervention for acute coronary syndromes: insights from the SECURE-PCI randomized trial. *JAMA Cardiol*. Published online September 24, 2018. doi:10.1001/jamacardio.2018.3408

### **eAppendix.** Statistical Analysis

**eTable 1.** Baseline Participant Characteristics of Patients Not Undergoing PCI

**eTable 2.** Timing of Study Drug Administration According to Study Group and Type of Acute Coronary Syndrome

**eTable 3.** Treatment Effect According to the Type of Treatment in the Non-PCI Group

**eTable 4.** Exploratory Analysis in STEMI Patients Subgroup

**eTable 5.** Exploratory Analysis in Non-STE ACS Patients Subgroup

This supplementary material has been provided by the authors to give readers additional information about their work.

## *eAppendix – Statistical Analysis*

Continuous variables are reported as mean and standard deviation (SD), or medians and interquartile ranges as appropriate. Categorical variables are summarized as frequencies.

Times to events are presented using Kaplan-Meier survival curves.

Both primary and secondary outcomes were analyzed according to percutaneous coronary intervention (PCI) and type of acute coronary syndrome (ACS).

The treatment effect of 80mg of atorvastatin versus placebo was assessed using Cox regression analysis adjusted for Age, Sex, ACS type, Previous use of chronic statin therapy, Hypertension, Hypercholesterolemia, Diabetes mellitus, Tobacco use, Previous MI, Previous PCI, Previous CABG, Previous Stroke, Previous Heart Failure, Renal Impairment, Obesity, Aspirin, and Clopidogrel/Ticagrelor/Prasugrel and expressed by hazard ratio (HR) and 95% confidence intervals (CI).

Analyses according to the type of ACS and to the timing of study drug administration before PCI were analyzed by interaction parameter testing in the unadjusted Cox regression.

All analyses considered a two-tailed alpha of 5% as statistically significant and were performed using R software, version 3.3.3. (R Foundation for Statistical Computing).

eTable 1: Baseline Participant Characteristics of Patients Not Undergoing PCI

| Characteristic                                                               | Atorvastatin        | Placebo             |
|------------------------------------------------------------------------------|---------------------|---------------------|
|                                                                              | (n = 734)           | (n = 743)           |
| Age (years) – mean ± sd                                                      | 61.7 ± 11.7 (n=734) | 61.1 ± 12.1 (n=743) |
| Female sex n (%)                                                             | 206/734 (28.1%)     | 228/743 (30.7%)     |
| <b>Diagnosis</b>                                                             |                     |                     |
| STEMI (%)                                                                    | 78/699 (11.2%)      | 69/710 (9.7%)       |
| NSTEMI (%)                                                                   | 432/699 (61.8%)     | 448/710 (63.1%)     |
| Unstable angina                                                              | 189/699 (27%)       | 193/710 (27.2%)     |
| Previous use of chronic statin therapy (6 months before randomization) n (%) | 243/734 (33.1%)     | 236/743 (31.8%)     |
| <b>Medical history (%)</b>                                                   |                     |                     |
| Hypertension                                                                 | 550/734 (74.9%)     | 548/743 (73.8%)     |
| Hypercholesterolemia                                                         | 276/734 (37.6%)     | 281/743 (37.8%)     |
| Diabetes mellitus                                                            | 238/734 (32.4%)     | 247/743 (33.2%)     |
| Tobacco use                                                                  | 156/734 (21.3%)     | 191/743 (25.7%)     |
| Previous MI                                                                  | 152/734 (20.7%)     | 135/743 (18.2%)     |
| Previous PCI                                                                 | 106/734 (14.4%)     | 96/743 (12.9%)      |
| Previous CABG                                                                | 41/734 (5.6%)       | 37/743 (5%)         |
| Previous Stroke                                                              | 36/734 (4.9%)       | 31/743 (4.2%)       |
| Renal Impairment                                                             | 26/734 (3.5%)       | 24/743 (3.2%)       |
| Obesity                                                                      | 121/734 (16.5%)     | 123/743 (16.6%)     |
| <b>Treatment strategy</b>                                                    |                     |                     |
| CABG                                                                         | 162/734 (22.1%)     | 171/743 (23%)       |
| Medical Management                                                           | 572/734 (77.9%)     | 572/743 (77%)       |
| <b>Reason why PCI was not performed</b>                                      |                     |                     |
| Clinical treatment                                                           | 450/734 (61.3%)     | 472/743 (63.5%)     |
| CABG                                                                         | 162/734 (22.1%)     | 171/743 (23.0%)     |
| Not a final diagnosis of ACS                                                 | 109/734 (14.9%)     | 88/743 (11.8%)      |
| Unknown                                                                      | 13/734 (1.8%)       | 12/743 (1.6%)       |
| <b>Other medical therapy (%)</b>                                             |                     |                     |
| Aspirin                                                                      | 567/734 (77.2%)     | 552/743 (74.3%)     |
| Clopidogrel/Ticagrelor/Prasugrel                                             | 465/734 (63.4%)     | 443/743 (59.6%)     |
| Beta-blockers                                                                | 485/734 (66.1%)     | 480/743 (64.6%)     |

|                          |                 |                 |
|--------------------------|-----------------|-----------------|
| ACE inhibitors or ARA    | 409/734 (55.7%) | 410/743 (55.2%) |
| Enoxaparin               | 246/734 (33.5%) | 225/743 (30.3%) |
| Non-fractionated heparin | 49/734 (6.7%)   | 40/743 (5.4%)   |
| Fondaparinux             | 138/734 (18.8%) | 137/743 (18.4%) |

**eTable 2.** Timing of study drug administration according to study group and type of acute coronary syndrome

| <b>Timing of drug administration before PCI</b> | <b>Atorvastatin</b> | <b>Placebo</b>   |
|-------------------------------------------------|---------------------|------------------|
| <b>Overall</b>                                  | (n=1351)            | (n=1359)         |
| Didn't received study drug before PCI           | 25/1351 (1.9%)      | 27/1359 (2%)     |
| Up to 2 hours before PCI                        | 577/1326 (43.5%)    | 571/1332 (42.9%) |
| Between 2 and 4 hours before PCI                | 463/1326 (34.9%)    | 484/1332 (36.3%) |
| Between 4 and 12 hours before PCI               | 236/1326 (17.8%)    | 201/1332 (15.1%) |
| More than 12 hours before PCI                   | 50/1326 (3.8%)      | 76/1332 (5.7%)   |
|                                                 |                     |                  |
| <b>STEMI</b>                                    | (n=417)             | (n=448)          |
| Didn't received study drug before PCI           | 10/417 (2.4%)       | 12/448 (2.7%)    |
| Up to 30 minutes before PCI                     | 164/407 (40.3%)     | 174/436 (39.9%)  |
| Between 30 minutes and 2 hours before PCI       | 147/407 (36.1%)     | 148/436 (33.9%)  |
| More than 2 hours before PCI                    | 96/407 (23.6%)      | 114/436 (26.1%)  |
|                                                 |                     |                  |
| <b>Non-STE ACS</b>                              | (n=915)             | (n=891)          |
| Didn't received study drug before PCI           | 14/915 (1.5%)       | 14/891 (1.6%)    |
| Up to 2 hours before PCI                        | 252/901 (28%)       | 243/877 (27.7%)  |
| Between 2 to 4 hours before PCI                 | 416/901 (46.2%)     | 413/877 (47.1%)  |
| Between 4 to 12 hours before PCI                | 192/901 (21.3%)     | 157/877 (17.9%)  |
| More than 12 hours before PCI                   | 41/901 (4.6%)       | 64/877 (7.3%)    |

**eTable 3: Treatment effect according to the type of treatment in the Non-PCI group**

|                    | Atorvastatin   | Placebo       | Absolute difference (%) | Hazard ratio      | P Value |
|--------------------|----------------|---------------|-------------------------|-------------------|---------|
|                    |                |               | (95% CI) <sup>a</sup>   | (95% CI)          |         |
| CABG group         | 20/162 (12.3%) | 12/171 (7%)   | -5.33 (-12.28; 1.62)    | 1.83 [0.90; 3.75] | 0.10    |
| Medical management | 29/572 (5.1%)  | 25/572 (4.4%) | -0.70 (-3.33; 1.93)     | 1.17 [0.69; 2.00] | 0.56    |

Abbreviations: CI denotes confidence interval.

Data presented as No. /total No. (%)

<sup>a</sup>Positive values favors Atorvastatin

**eTable 4. Exploratory Analysis in STEMI Patients Subgroup**

| Outcomes                                                          | Atorvastatin  | Placebo        | Absolute difference (%) | Unadjusted Hazard ratio        | P value |
|-------------------------------------------------------------------|---------------|----------------|-------------------------|--------------------------------|---------|
|                                                                   |               |                | (95% CI) <sup>b</sup>   | (95% CI)                       |         |
| <b>Exploratory analysis in STEMI patients subgroup at 30 days</b> |               |                |                         |                                |         |
| MACE                                                              | 30/417 (7.2%) | 58/448 (12.9%) | 5.75 (1.54 to 9.96)     | 0.54 (0.35 to 0.84)            | 0.01    |
| Death                                                             | 19/417 (4.6%) | 34/448 (7.6%)  | 3.03 (-0.36 to 6.43)    | 0.59 (0.34 to 1.04)            | 0.07    |
| Cardiovascular Death                                              | 19/417 (4.6%) | 32/448 (7.1%)  | 2.59 (-0.76 to 5.93)    | 0.63 (0.36 to 1.11)            | 0.11    |
| Myocardial Infarction                                             | 11/417 (2.6%) | 30/448 (6.7%)  | 4.06 (1.05 to 7.07)     | 0.39 (0.19 to 0.77)            | 0.01    |
| Peri-PCI MI                                                       | 9/417 (2.2%)  | 19/448 (4.2%)  | 2.08 (-0.48 to 4.64)    | 0.51 (0.23 to 1.12)            | 0.09    |
| Non-PCI related MI                                                | 3/417 (0.7%)  | 13/448 (2.9%)  | 2.18 (0.20 to 4.17)     | 0.24 (0.07 to 0.85)            | 0.03    |
| Revascularization                                                 | 2/417 (0.5%)  | 4/448 (0.9%)   | 0.41 (-0.91 to 1.74)    | 0.53 (0.10 to 2.89)            | 0.46    |
| Urgent/Target Vessel                                              | 1/417 (0.2%)  | 3/448 (0.7%)   | 0.43 (-0.69 to 1.55)    | 0.35 (0.04 to 3.38)            | 0.37    |
| Stroke                                                            | 1/417 (0.2%)  | 4/448 (0.9%)   | 0.65 (-0.57 to 1.87)    | 0.26 (0.03 to 2.33)            | 0.23    |
| Stent Thrombosis                                                  | 4/417 (1%)    | 10/448 (2.2%)  | 1.27 (-0.62 to 3.16)    | 0.42 (0.13 to 1.33)            | 0.14    |
| <b>Exploratory analysis at 7 days or hospital discharge</b>       |               |                |                         |                                |         |
| Bleeding <sup>a</sup>                                             | 1/417 (0.2%)  | 2/448 (0.4%)   | 0.21 (-0.78; 1.19)      | 0.69 (0.14; 3.43) <sup>a</sup> | 1.00    |
| Rhabdomyolysis <sup>a</sup>                                       | 0/417 (0%)    | 1/448 (0.2%)   | -                       | -                              | -       |

Abbreviations: CI denotes confidence interval.

Data presented as No. /total No. (%)

<sup>a</sup>Effect estimates are risk ratios instead of hazard ratios.

<sup>b</sup>Positive values favors Atorvastatin

**eTable 5. Exploratory analysis in Non-STE ACS patients subgroup.**

| Outcomes                                                 | Atorvastatin  | Placebo       | Absolute difference (%) | Unadjusted Hazard ratio          | P value |
|----------------------------------------------------------|---------------|---------------|-------------------------|----------------------------------|---------|
|                                                          |               |               | (95% CI) <sup>b</sup>   | (95% CI)                         |         |
| <b>Clinical Outcomes at 30 days</b>                      |               |               |                         |                                  |         |
| MACE                                                     | 47/915 (5.1%) | 54/891 (6.1%) | 0.92 (-1.31 to 3.16)    | 0.84 (0.57 to 1.24)              | 0.39    |
| Death                                                    | 10/915 (1.1%) | 9/891 (1%)    | -0.08 (-1.11 to 0.94)   | 1.09 (0.44 to 2.68)              | 0.86    |
| Cardiovascular Death                                     | 8/915 (0.9%)  | 5/891 (0.6%)  | -0.31 (-1.20 to 0.58)   | 1.56 (0.51 to 4.78)              | 0.43    |
| Myocardial Infarction                                    | 35/915 (3.8%) | 40/891 (4.5%) | 0.66 (-1.29 to 2.62)    | 0.84 (0.54 to 1.33)              | 0.47    |
| Peri-PCI MI                                              | 30/915 (3.3%) | 35/891 (3.9%) | 0.65 (-1.18 to 2.48)    | 0.83 (0.51 to 1.35)              | 0.45    |
| Non-PCI related MI                                       | 5/915 (0.5%)  | 6/891 (0.7%)  | 0.13 (-0.70 to 0.96)    | 0.81 (0.25 to 2.66)              | 0.73    |
| Coronary Revascularization                               | 6/915 (0.7%)  | 8/891 (0.9%)  | 0.24 (-0.68 to 1.16)    | 0.73 (0.25 to 2.11)              | 0.57    |
| Urgent/Target Vessel                                     | 2/915 (0.2%)  | 4/891 (0.4%)  | 0.23 (-0.41 to 0.87)    | 0.49 (0.09 to 2.67)              | 0.41    |
| Stroke                                                   | 3/915 (0.3%)  | 4/891 (0.4%)  | 0.12 (-0.56 to 0.81)    | 0.73 (0.16 to 3.27)              | 0.68    |
| Stent Thrombosis                                         | 3/915 (0.3%)  | 5/891 (0.6%)  | 0.23 (-0.49 to 0.96)    | 0.59 (0.14 to 2.46)              | 0.47    |
| <b>Clinical Outcomes at 7 days or hospital discharge</b> |               |               |                         |                                  |         |
| Bleeding <sup>a</sup>                                    | 4/915 (0.4%)  | 6/891 (0.7%)  | 0.24 (-0.56 to 1.03)    | 0.79 (0.37 to 1.69) <sup>a</sup> | 0.54    |
| Rhabdomyolysis <sup>a</sup>                              | 0             | 0             | -                       | -                                | -       |

Abbreviations: CI denotes confidence interval.

Data presented as No. /total No. (%)

<sup>a</sup>Effect estimates are risk ratios instead of hazard ratios.

<sup>b</sup>Positive values favors Atorvastatin
