# Supplementary material
Source: PubMed Central journal article supplement (PMC6583055)
Supplement: jamacardiol-e183408-s002.pdf [file jamacardiol-e183408-s002.pdf]

## **Data Sharing Statement**

Lopes. Timing of Loading Dose of Atorvastatin in Patients Undergoing Percutaneous Coronary Intervention for Acute Coronary Syndromes.

*JAMA Cardiol.* Published November 21, 2018.

10.1001/jamacardio.2018.3408

### **Data**

**Data available:** No
